# Supplementary material for: Construction of Chemically Bonded Interface of Organic/Inorganic g-C3N4/LDH Heterojunction for Z-Schematic Photocatalytic H2 Generation
Source: MDPI journal article supplement (doi:10.3390/nano11102762), 2021-10-18
Supplement: s1 [file s1]

## Supporting Information

# Construction of Chemically Bonded Interface of Organic/Inorganic g-C<sub>3</sub>N<sub>4</sub>/LDH Heterojunction for Z-Schematic Photocatalytic H<sub>2</sub> Generation

Yuzhou Xia <sup>1</sup>, Ruowen Liang <sup>1</sup>, Min-Quan Yang <sup>2,\*</sup>, Shuying Zhu <sup>3,\*</sup> and Guiyang Yan <sup>1, 4,\*</sup>

<sup>1</sup> Fujian Province University Key Laboratory of Green Energy and Environment Catalysis, Ningde Normal University, Ningde, Fujian, 352100, P. R. China

<sup>2</sup> College of Environmental Science and Engineering, Fujian Key Laboratory of Pollution Control & Resource Reuse, Fujian Normal University, Fuzhou 350007, P. R. China

<sup>3</sup> College of Chemistry, Fuzhou University, Fuzhou 350116, P. R. China

<sup>4</sup> Provincial Key Laboratory of Featured Materials in Biochemical Industry, Ningde Normal University, Ningde, Fujian, 352100, P. R. China

\* Correspondence: yangmq@fjnu.edu.cn (Prof. Min-Quan Yang), syzhu@fzu.edu.cn (Dr. Shuying Zhu) and ygyfjnu@163.com (Prof. Guiyang Yan)

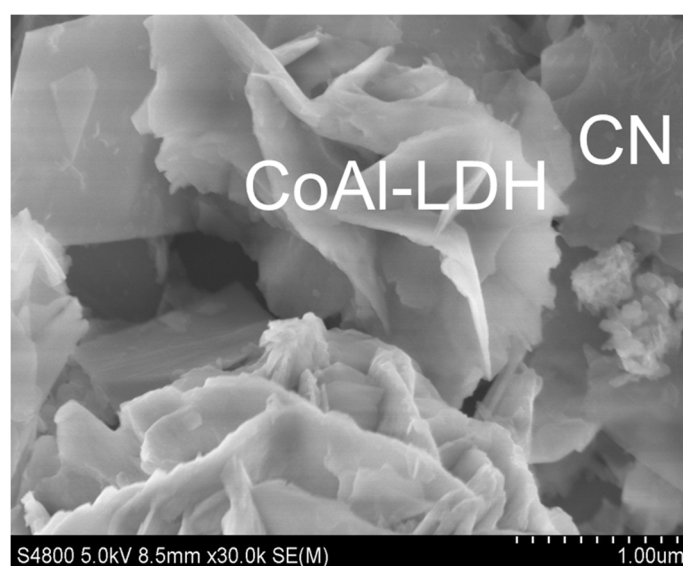

**Figure S1.** SEM image of the prepared CN-CoAl<sub>0.7</sub>.

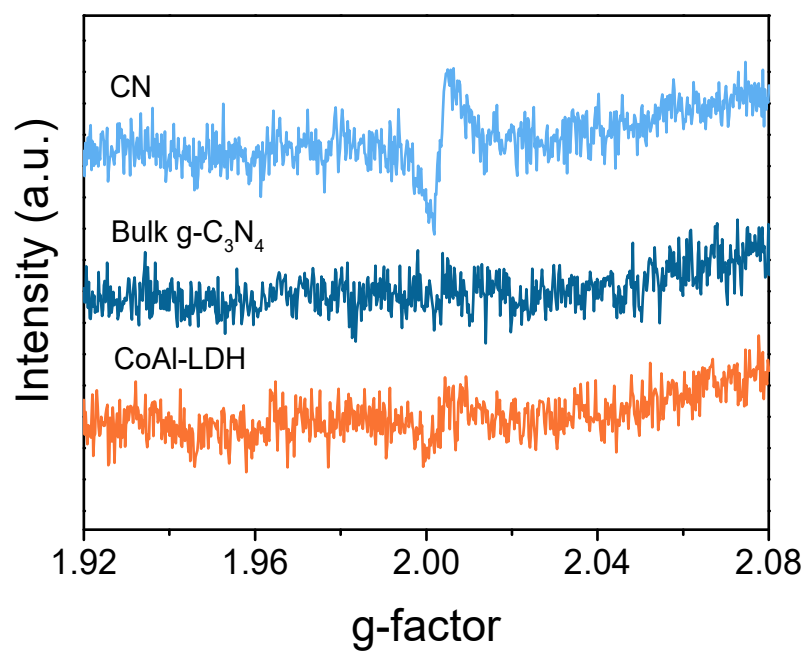

**Figure S2.** EPR spectra of bulk g-C<sub>3</sub>N<sub>4</sub>, CN and CoAl-LDH.

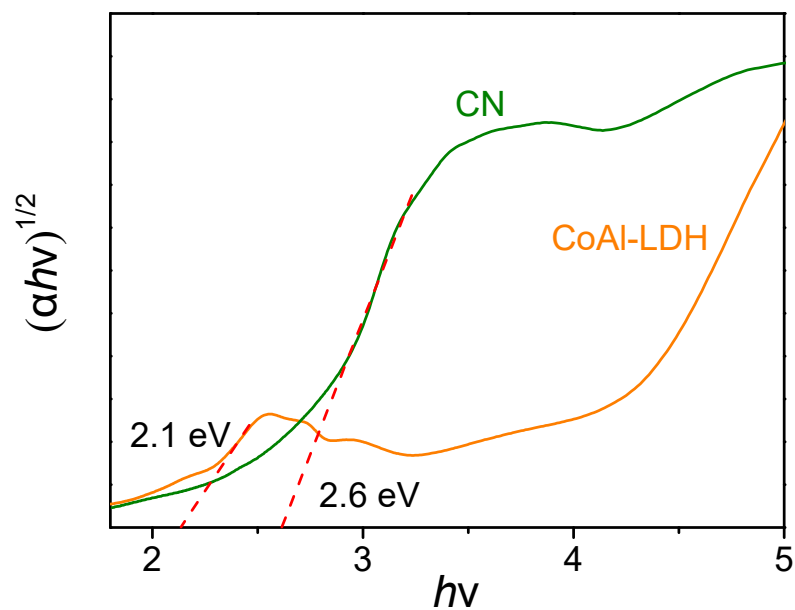

**Figure S3.** Tauc plots of CN and CoAl-LDH.

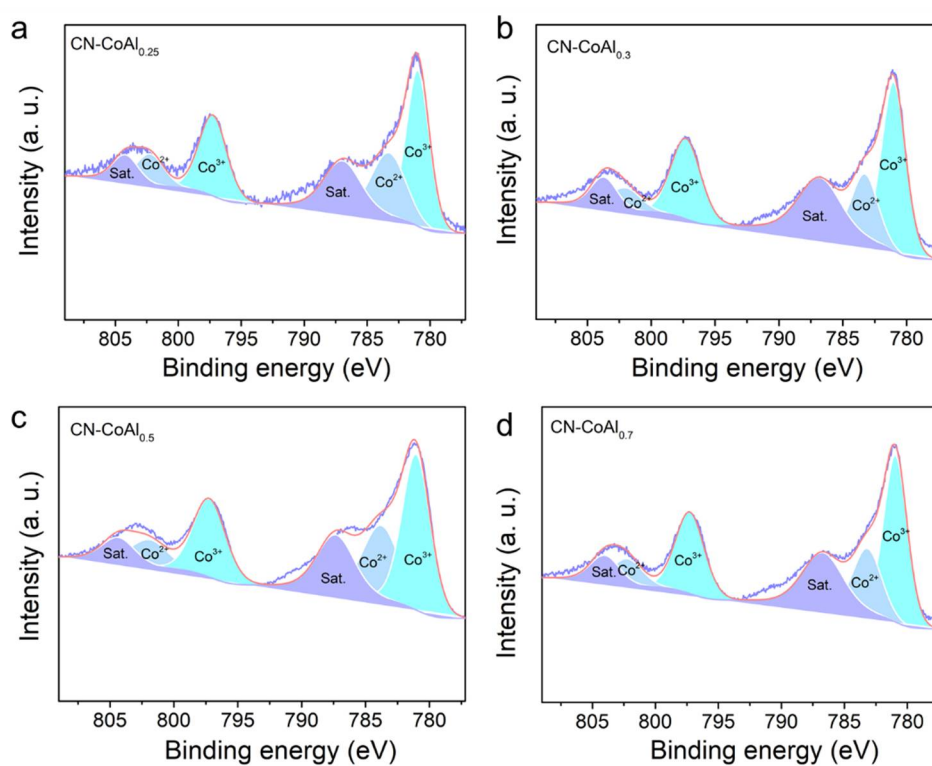

**Figure S4.** XPS spectra of Co in CN-CoAl<sub>x</sub> samples CN-CoAl<sub>0.25</sub> (a), CN-CoAl<sub>0.3</sub> (b), CN-CoAl<sub>0.5</sub> (c) and CN-CoAl<sub>0.7</sub> (d).

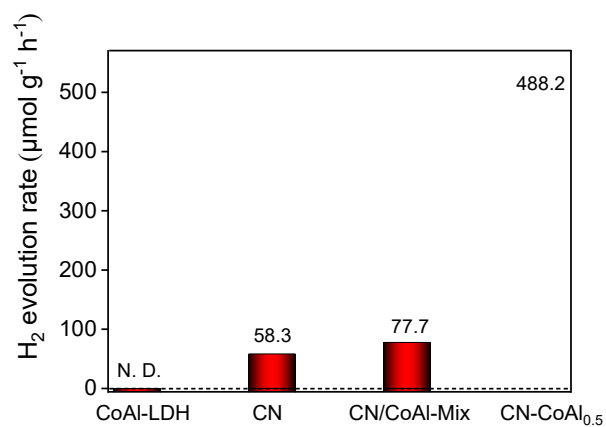

**Figure S5.** Photocatalytic H<sub>2</sub> evolution rates of CoAl-LDH, CN, CN/CoAl-Mix and CN-CoAl<sub>0.5</sub>.

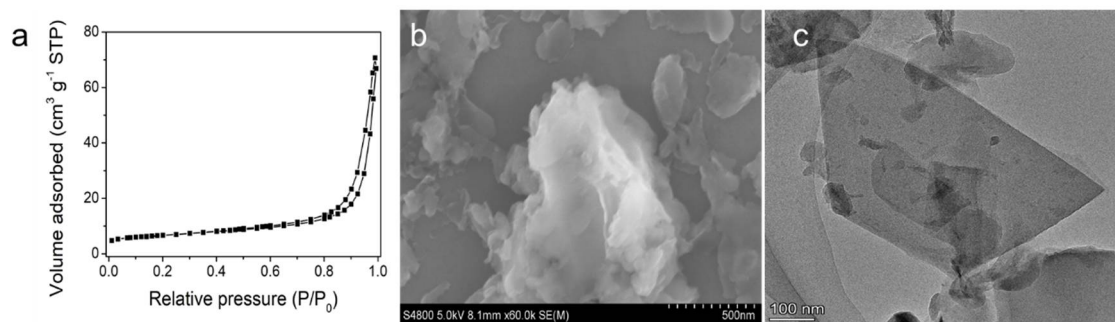

**Figure S6.** BET (a), SEM (b) and TEM (c) analyses of CN-CoAl<sub>0.5</sub> after 5 cycles of H<sub>2</sub>-generation stability test.
